# Supplementary material
Source: PubMed Central journal article supplement (PMC3081015)
Supplement: 1015449108_pnas.201015449SI.pdf [file 1015449108_pnas.201015449SI.pdf]

# Supporting Information

Feng et al. 10.1073/pnas.1015449108

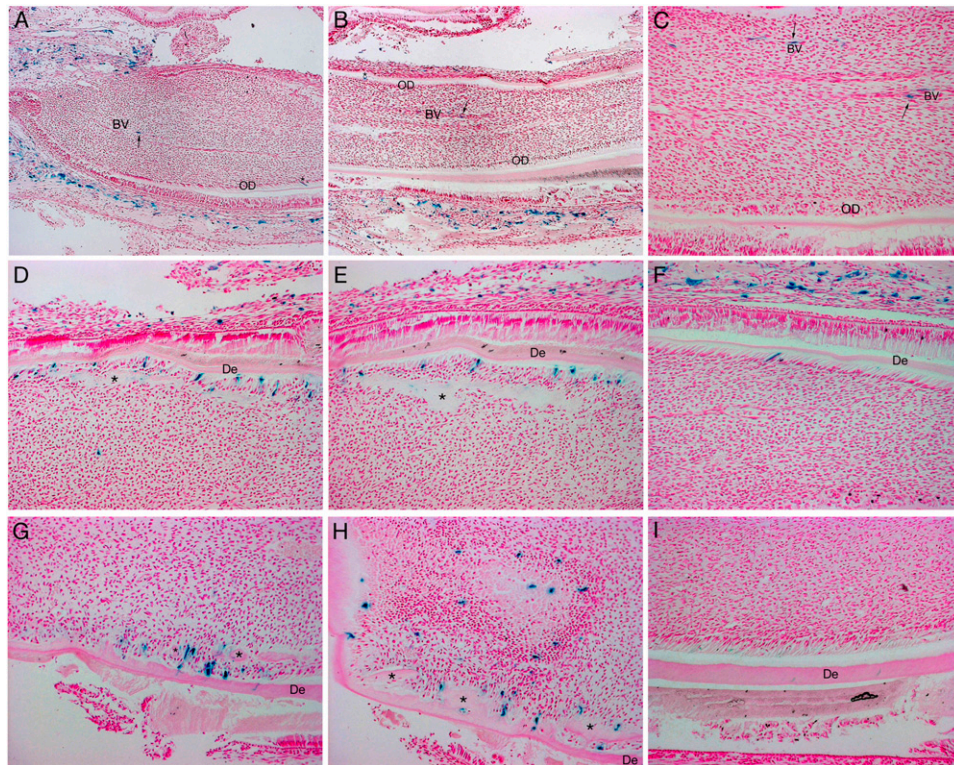

**Fig. S1.** NG2Cre expression following tamoxifen in normal tooth growth and following injury. Following tamoxifen administration at P2 to NG2creERTM; Rosa26R pups, NG2cre-activity can be visualized by LacZ staining. Low magnification of a control side (nondamaged) incisor (A and B) showed very few LacZ +ve cells in incisor pulp tissue, most of which were associated with blood vessels (arrow) and rarely, one or two odontoblasts were LacZ +ve (asterisk). (C) Pericytes on blood vessel walls inside the dental pulp labeled by LacZ staining (arrows). A massive increase of LacZ+ve cells with odontoblast morphology were found around the reparative area (asterisk) 2 d following damage (D and E), compared to control side (F). Further increased in LacZ+ve odontoblast-like cells were found surrounding the more-mature reparative dentin area (asterisk) 4 d after damage (G and H), compared to similar area in control side (I). OD, odontoblast layer; BV, blood vessel; De, dentin.

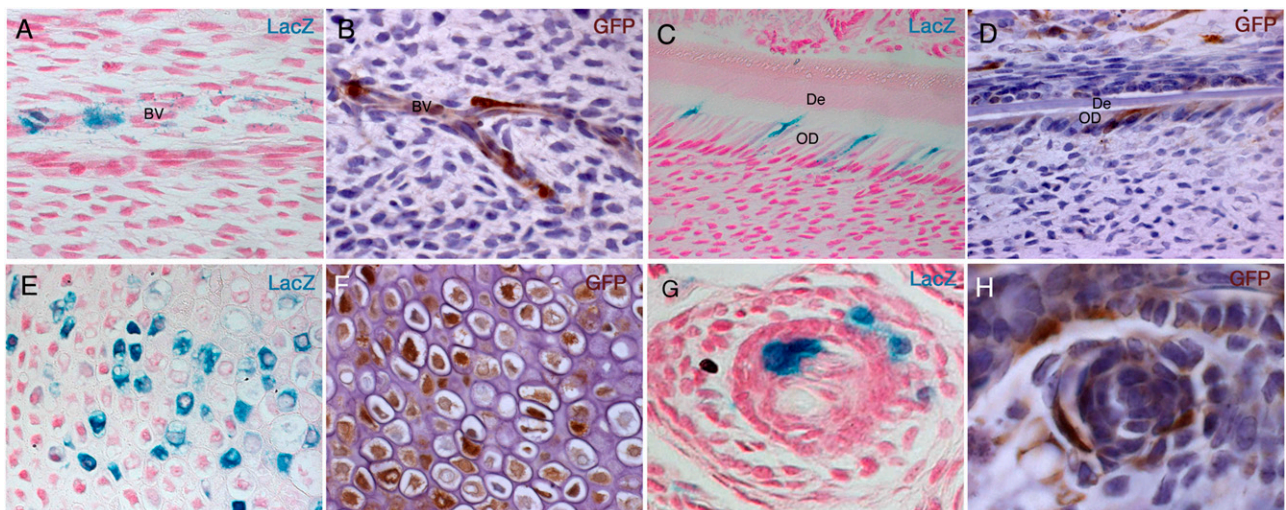

**Fig. S2.** Positive controls for cre recombination. Following tamoxifen injection of P2 NG2CreER; Rosa26R pups, NG2cre-activity was induced and visualized by LacZ staining. At 4 d later, blue LacZ-positive cells were seen on dental pulp blood vessels (pericytes) (A), in some odontoblast cells (C), in NG2-expressing cells of cartilage (E), and in hair follicles (G). GFP immunohistochemistry of NG2cre; Z/EG P1 pups shows NG2-cre activity in the same tissues: blood vessel (pericytes) (B), some odontoblasts (D), cartilage (F), and hair follicle (H). BV, blood vessel, De, dentin, OD, odontoblast layer.



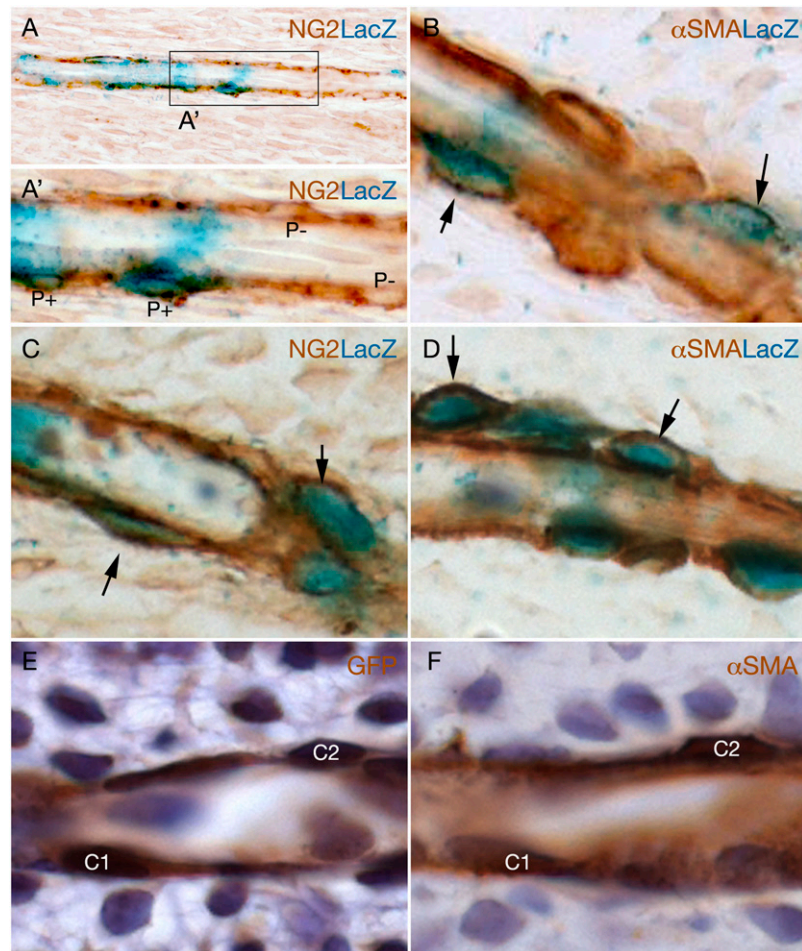

**Fig. 53.** Coexpression of perivascular markers and genetically labeled pericytes. Genetically labeled pericytes in NG2creER;R26R mice express pericyte markers NG2 (A) and  $\alpha$ -SMA (B). Approximately half of NG2-positive pericytes express  $\beta$ -gal activity, shown by LacZ staining (A). Higher magnification shows P+ (LacZ-positive; NG2-positive) and P- (LacZ-negative; NG2-positive) cells lining along the vessels (A'). LacZ-positive pericytes also express the pericyte marker  $\alpha$ -SMA (arrows) (B). X-LacZ-labeled pericytes coexpress pericyte markers NG2 (arrows, C) and  $\alpha$ -SMA (arrows, D). Consecutive sections of NG2cre;Z/EG showing NG2-cre labeled cells in a blood vessel (E; C1, cell 1; C2, cell 2) also express the pericyte marker  $\alpha$ -SMA (F; C1, cell 1; C2, cell 2).
